## 1 Title

2 *Area of Habitat maps for the world's terrestrial birds and mammals*

## 3 Authors

4 Maria Lumbierres<sup>1,3</sup>, Prabhat Raj Dahal<sup>1,3</sup>, Carmen D. Soria<sup>1,3</sup>, Moreno Di Marco<sup>2</sup>, Stuart H. M.  
5 Butchart<sup>3,4</sup>, Paul F. Donald<sup>3,4</sup>, Carlo Rondinini<sup>1</sup>

## 6 Affiliations

7 1. Global Mammal Assessment Program, Department of Biology and Biotechnologies, Sapienza  
8 University of Rome, Viale dell'Università 32, 00185 Rome, Italy

9 2. Department of Biology and Biotechnologies, Sapienza University of Rome, Viale dell'Università 32,  
10 00185 Rome, Italy

11 3. BirdLife International, David Attenborough Building, Pembroke Street, Cambridge CB2 3QZ, UK.

12 4. Department of Zoology, University of Cambridge, Downing Street, Cambridge CB2 3EJ, UK.

13

14 corresponding author: Maria Lumbierres ([maria.lumbierrescivit@uniroma1.it](mailto:maria.lumbierrescivit@uniroma1.it))

15

## 16 Abstract (170 words maximum)

17

18 Area of Habitat (AOH) is 'the habitat available to a species, that is, habitat within its range'. It  
19 complements a geographic range map for a species by showing potential occupancy and reducing  
20 commission errors. AOH maps are produced by subtracting areas considered unsuitable for the species  
21 from their range map, using information on each species' associations with habitat and elevation. We  
22 present AOH maps for 5,481 terrestrial mammal and 10,651 terrestrial bird species (including 1,816  
23 migratory bird species for which we present separate maps for the resident, breeding and non-  
24 breeding areas). Our maps have a resolution of 100 m. On average, AOH covered  $66\pm 28\%$  of the range  
25 maps for mammals and  $64\pm 27\%$  for birds. The AOH maps were validated independently, following a  
26 novel two-step methodology: a modelling approach to identify outliers and a species-level approach  
27 based on point localities. We used AOH maps to produce global maps of the species richness of  
28 mammals, birds, globally threatened mammals and globally threatened birds.

29

## 30 Background & Summary

31 Knowing the distribution of species is crucial for effective conservation action. However, accurate and  
32 high-resolution spatial data are only available for a limited number of species<sup>1,2</sup>. For mammals and  
33 birds, the most comprehensive and widely used global distribution dataset is the set of range maps  
34 compiled as part of the assessments for the International Union for Conservation of Nature (IUCN) Red  
35 List. These represent each species' distributional limits and tend to minimise omission errors (i.e. false  
36 absences) at the expense of commission errors (i.e. false presences)<sup>3,4</sup>. Therefore, they often contain  
37 sizeable areas that are not occupied by the species.

38 Maps of the Area of Habitat (AOH; previously known as Extent of Suitable Habitat, ESH) complement  
39 range maps by indicating potential occupancy within the range, thereby reducing commission errors<sup>5</sup>.  
40 AOH is defined as 'the habitat available to a species, that is, habitat within its range'<sup>5</sup>. These models  
41 are produced by subtracting areas unsuitable for the species within their range, using information on  
42 each species' associations with habitat and elevation<sup>5-8</sup>. Comprehensive sets of AOH maps have been  
43 produced in the past for mammals<sup>6</sup> and amphibians<sup>7</sup>, as well as subsets of birds<sup>8,9</sup>. The percentage of  
44 a species' range covered by the AOH varies depending on the methodology used to associate species  
45 to their habitats, and their habitats to land-cover, the coarseness of the range map, the region in which  
46 the species is distributed, and the species' habitat specialisation and elevation limits<sup>5</sup>. For example,

47 Rondinini et al.<sup>6</sup> found that, when considering elevation and land cover features for terrestrial  
48 mammals, the AOH comprised on average 55% of the range. Ficetola et al.<sup>7</sup> obtained a similar  
49 percentage when analysing amphibians (55% for forest species, 42% open habitat species and 61% for  
50 habitat generalists). Beresford et al.<sup>8</sup> found that AOH covered a mean of 27.6% of the range maps of  
51 157 threatened African bird species. In 2019, Brooks et al.<sup>5</sup> proposed a formal definition and  
52 standardised methodology to produce AOH, limiting the inputs to habitat preferences, elevation limits,  
53 and geographical range.

54 AOH production requires knowledge on which habitats a species occurs in and their location within its  
55 range<sup>1</sup>. Information on habitat preference is documented for each assessed species in the IUCN Red  
56 List<sup>10</sup>, following the IUCN Habitats Classification Scheme<sup>11</sup>. However, IUCN does not define habitat  
57 classes in a spatially explicit way, therefore, we used a recently published translation table that  
58 associates IUCN Habitat Classification Scheme classes with land cover classes<sup>12</sup>. Species' elevation  
59 limits were also extracted from the IUCN Red List.

60 We developed AOH maps for 5,481 terrestrial mammal and 10,651 terrestrial bird species. For 1,816  
61 bird species defined by BirdLife International as migratory, we developed three AOH maps, one for the  
62 resident range, one for the breeding range and one for the non-breeding range. The maps are  
63 presented in a regular latitude/longitude grid with an approximate 100m resolution at the equator. On  
64 average, the AOH covers 66 of the geographical range for mammals and 64+27% for birds. We used  
65 the resulting AOH maps to produce four global species richness layers: for mammals, birds, globally  
66 threatened mammals and globally threatened birds.

67 The AOH maps have multiple conservation applications<sup>5,13,14</sup>, such as assessing species' distributions  
68 and extinction risk, improving the accuracy of conservation planning, monitoring habitat loss and  
69 fragmentation, and guiding conservation actions. AOH has been proposed as an additional spatial  
70 metric to be documented in the Red List<sup>5</sup>, and is used as an assessment parameter in the identification  
71 of Key Biodiversity Areas<sup>15</sup>.

## 72 **Methods**

73  
74 We produced maps for species associated with at least one terrestrial habitat in the IUCN Habitat  
75 Classification Scheme<sup>11</sup>. We excluded a total of 342 species of mammals and 495 species of birds (6.2%  
76 and 4.6% out of 5,481 and 10,651 species, respectively). These comprised 135 mammals and 168 birds  
77 exclusively associated with marine habitats (i.e., marine neritic, marine oceanic, marine deep ocean  
78 floor, marine intertidal or marine coastal/supratidal), 29 mammals exclusively associated with caves  
79 and subterranean habitats, 131 mammals with no associated habitat codes, 8 mammals and 162 birds  
80 classified as Extinct, 1 mammal and 5 birds classified as Extinct in the will, 12 mammal and 142 bird  
81 species that are restricted to small islands not included in the land-cover map we used, and 26  
82 mammals and 18 birds that had null AOH, caused by errors in the coding of habitat and elevation<sup>16</sup>.

83 Species may have more than one range polygon, coded according to presence (the species is or was in  
84 the area), origin (why and how the species is in the area) and seasonality (seasonal presence of the  
85 species in the area)<sup>17</sup>. We used as a base for the AOH maps a predetermined subset of the IUCN Red  
86 List range<sup>18</sup> polygons for each species<sup>16</sup>. Following the Global Standard for the Identification of Key  
87 Biodiversity Areas Guidelines<sup>19</sup>, we selected range polygons with *extant* and *probably extant* presence;  
88 *native*, *reintroduced*, and *assisted colonisation* origin; and *resident* seasonality for non-migratory  
89 species (all mammals and non-migratory birds; 8,979 species). For migratory birds (1,816 species), we  
90 kept separate the ranges for *breeding* (1,446 species), *non-breeding* (1,550 species) and a combination  
91 of *resident* and *uncertain* (1,290 species) seasonality. We provide an R script to merge the AOH sub-  
92 maps into a single composite map for each species. For 18 mammal and 22 bird species classified as  
93 Critical Endangered, there were no presence polygons coded as *extant* or *probably extant*. As the

94 conservation of these species is a priority, we produced AOH maps using the *possibly extinct* polygon  
95 for these taxa.

96 AOH maps are produced by subtracting unsuitable areas from range maps, using data on each species'  
97 associated habitat. As habitats in the IUCN Red List are not spatially explicit (although we note the  
98 existence of recently published maps<sup>20</sup>), we used a recently published translation table<sup>12</sup> based on the  
99 Copernicus Global Land Service Land Cover (CGLS-LC100)<sup>21,22</sup> and the European Space Agency Climate  
100 Change Initiative land cover 2015 (ESA-CCI)<sup>23</sup>. We developed the AOH maps based on CGLS-LC100 as  
101 CGLS-LC100 has a higher resolution and accuracy than ESA-CCI. CGLS-LC100 is in a regular  
102 latitude/longitude grid (EPSG:4326) with the ellipsoid WGS 1984 with a grid resolution of 1°/1008 or  
103 approximately 100 m at the equator, defining the resolution of the AOH maps. The translation table  
104 presented the relation between each habitat in the IUCN Classification Scheme and each land-cover  
105 class as a continuous variable. To create a binary table of association or non-association, Lumbierres  
106 et al.<sup>12</sup> proposed three potential thresholds based on the tertiles of the positive association values of  
107 the table. We produced maps for the three proposed thresholds and evaluated the ratio of AOH area  
108 to range area. As the threshold increased, the ratio decreased, and the results were more similar to  
109 previous AOH maps<sup>6</sup>. Dahal et al.<sup>16</sup> evaluated these three thresholds and corroborated that an increase  
110 in the threshold did not reduce the performance of the AOH maps during validation. Therefore, we  
111 present the maps produced using the highest threshold (odds ratio > 1.7). Species' elevation limits were  
112 extracted from the IUCN Red List<sup>18</sup>. To subtract the parts of the range outside the elevation limits, we  
113 used the Shuttle Radar Topography Mission<sup>24</sup> map, resampled at the resolution of the CGLS-LC100.

114 One of the main complexities of this analysis was the large amount of data generated in the process.  
115 Therefore, the AOH maps were produced using the GRASS GIS<sup>25</sup> software, which allows processing  
116 large amounts of raster data efficiently. The AOH production procedure consisted of four steps,  
117 following Rondinini et al. (2011)<sup>6</sup>: 1) Transforming the habitat codes of each species into land cover  
118 classes using the translation table<sup>12</sup>. 2) Creating a base map that combines the information on land  
119 cover and elevation 3) Creating reclassification files containing the information on land cover and  
120 elevation preferences for each species. 4) Reclassifying the base map based on the reclassification files  
121 to create the AOH for each species. We also created intermediate AOH maps clipped only by elevation  
122 or only by land cover, in order to explore the influence of each of these parameters on the final AOH.  
123 Once the AOH were produced, we calculated richness maps by stacking the AOH maps.

## 124 **Data Records**

125 With this article we accompany a sample, the full data set is stored in Dryad Open Access Repository.  
126 The AOH data, including tables and maps. The data are organised by taxonomic Class and Order with  
127 zipped folders by Order. In the case of birds, we separated migratory species from non-migratory  
128 species. In each class folder, maps are organised by taxonomic. AOH maps in GeoTiff. An additional  
129 folder contains the richness maps for each class of all species and of globally threatened species. In  
130 each folder, we include a table with information of the excluded species, indicating the reason for  
131 exclusion; and a table with the included species and the AOH/range ratio. For migratory birds, we  
132 included a table specifying which maps (breeding, non-breeding and resident) each species has and  
133 code to merge the different parts of the AOH.

## 134 **Technical Validation**

135 The accuracy of the AOH maps was assessed using a novel methodology developed by Dahal et al.<sup>16</sup>  
136 and full details of the validation are provided there. This methodology allowed validation of AOH maps  
137 for species with or without point localities. Previous AOH maps were validated only using point  
138 localities and polygons of occurrence<sup>6-8</sup>, leaving some of the AOH maps unvalidated.

139 Our method employed a two-step approach. The first step identified potential systematic errors in the  
140 AOH maps using a modelling approach. This approach flagged 178 and 64 AOH maps for birds and

141 mammals respectively that were carefully studied to identify the sources of potential errors. These  
142 potential errors were caused by inaccuracies in species' elevation limits, habitat coding or the  
143 translation table<sup>12</sup> used to assign habitat to land cover. Work is currently underway to address these  
144 issues, and improved AOH maps will be available in the future for download at  
145 <https://www.iucnredlist.org/resources/grid/spatial-data>. A complete list of flagged maps can be  
146 found in Dahal et al.<sup>16</sup>

147 The second step used point localities to validate the maps at the species level. To validate the AOH  
148 maps, the proportion of points localities falling inside the AOH (point prevalence) was compared with  
149 the A.O.H./range ratio (model prevalence). If point prevalence exceeded model prevalence, the AOH  
150 was assumed to be better than a random distribution within the species' range<sup>6</sup>. This was done for the  
151 4889 birds (46% of all bird species) and 420 mammals (8% of all mammal species) that had available  
152 point locality data. For mammals, this represented 157 species more than in a previous set of AOH<sup>6</sup>  
153 maps published in 2011. AOH maps were better than random for 95.9% bird and 95 % mammal  
154 species. The unavailability of point locality data for half of bird species and most mammal species  
155 remains a major limitation of the validation analysis. However, the first step of the method allowed us  
156 to assess at least the general soundness of AOH maps for species that did not have suitable point  
157 localities for validation.

## 158 Usage Notes

159 The maps are presented in raster byte GeoTIFF format. The values of the maps are 1 for the AOH area  
160 and Null for the background. The geographical extent of each map is defined by the species' range.  
161 Each species map is presented separately with the species binomial name, and the genus and specific  
162 epithet separated by an underscore. For migratory birds we produced three different maps, that are  
163 coded using, R, B and N for resident, breeding and non-breeding AOH maps, respectively. We present  
164 code written in R to merge the different AOH maps for migratory species according to the needs of the  
165 user. For species with null AOH we recommend using the mapped range.

## 166 Code Availability

167 The code to produce the AOH is derived from code produced by Rondinini et al. (2011)<sup>6</sup>. AOH maps  
168 are produced reclassifying a base map that contains information on elevation and land cover. The  
169 geographical range maps are used to mask the areas outside the distribution of the species. Each  
170 species has a reclassification file that indicates which land cover classes and elevations are suitable. To  
171 transform the habitat information into land cover we used the translation table<sup>12</sup>. The code is both in  
172 GRASS and R.

173

### 174 *Base map*

175 The base map is the map that is reclassified to produce the AOH. Each cell value is a combination of  
176 land cover and elevation, where the three first digits represent land cover and the three last digits  
177 elevation in m/10.

```
# GRASS SCRIPT
# Grass location and mapset
grass -c -e EPSG:4326 /data/grassdata/latlong
grass -c -e /data/grassdata/latlong/AOH
# Import data
r.import in=land_cover out=land_cover # Import data
r.import in=srtm out=srtm
# Base map calculation
r.mapcalc expression="base_map=(land_cover*1000)+(round(srtm/10))"
```

178

### 179 *Reclassification Files*

180 The GRASS reclass function has a specific format for the reclassification instructions. The script  
181 produces reclass files to apply to the base map in GRASS to produce maps of area of habitat for

182 terrestrial species. It reads a file that contains land cover associations, with the following column  
183 headers: species name, one column per land cover class (with numeric column names for land cover;  
184 e.g., 10, 20, 210), and two columns representing elevation range (elevation\_min and elevation\_max).  
185 If the elevation range for a species is unrecorded, it is set to 0-9000 m.

```
# R SCRIPT
setwd()
options(scipen=99999)#Disable scientific notation
lc <- function(x){
  as.numeric(substr(x, 2, nchar(x)))*1000
}
sp_lc_el <- fread("sp_land_cover_elevation_file")
sp_lc_el$elevation_min<-round(sp_lc_el$elevation_min/10,0) # min
sp_lc_el$elevation_max<-round(sp_lc_el$elevation_max/10,0) #max
ncol <- ncol(sp_lc_el)
setwd("reclass_files_folder") # Path where to save reclassification files
for(i in 1:dim(sp_lc_el)[1]){
  for(j in 2:(ncol-2)){
    if(sp_lc_el[i,j]==1){
      if(sp_lc_el[i,(ncol-1)]==0 & sp_lc_el[i,ncol]==900){
        write.table(paste0(lc(names(sp_lc_el)[j]),
                           " thru ",lc(names(sp_lc_el)[j])+900," = 1"),
                    file=paste0(sp_lc_el[i,1]),
                    append=T,quote=F,row.names=F,col.names=F)
      }
      if(sp_lc_el[i,(ncol-1)]==0 & sp_lc_el[i,ncol]<900){
        write.table(paste0(lc(names(sp_lc_el)[j])," thru ",
                           lc(names(sp_lc_el)[j])+sp_lc_el[i,ncol]," =
1"),
                    file=paste0(sp_lc_el[i,1]),
                    append=T,quote=F,row.names=F,col.names=F)
      }
      if(sp_lc_el[i,(ncol-1)]>0 & sp_lc_el[i,ncol]==900){
        write.table(paste0(lc(names(sp_lc_el)[j])+sp_lc_el[i,(ncol-1)],
                           " thru ",lc(names(sp_lc_el)[j])+900," = 1"),
                    file=paste0(sp_lc_el[i,1]),
                    append=T,quote=F,row.names=F,col.names=F)
      }
      if(sp_lc_el[i,(ncol-1)]>0 & sp_lc_el[i,ncol]<900){
        write.table(paste0(lc(names(sp_lc_el)[j])+sp_lc_el[i,(ncol-1)],
                           " thru ",
                           lc(names(sp_lc_el)[j])+sp_lc_el[i,ncol]," =
1"),
                    file=paste0(sp_lc_el[i,1]),
                    append=T,quote=F,row.names=F,col.names=F)
      }
    }
  }
  write.table("* = 0",file=paste0(sp_lc_el[i,1])
, append=T,quote=F,row.names=F,col.names=F)
  write.table("end",file=paste0(sp_lc_el[i,1])
, append=T,quote=F,row.names=F,col.names=F)
}
```

186

### 187 **AOH production**

188 AOH is confined inside the geographical range. The geographical range maps can be downloaded  
189 from <https://www.iucnredlist.org for mammals>, and <http://datazone.birdlife.org/species/requestdis for birds>.  
190 The ranges are imported into GRASS and rasterised. The ranges are used to mask the area

191 outside the species distribution. Inside the non-masked areas, the base map is reclassified using the  
192 reclassification file.  
193

```
# GRASS SCRIPT
for i in `cat species_list` `
do
v.in.ogr input=$i.shp output=vec_$i snap=1e-09 --overwrite
g.region -a vector=vec_$i res=0:00:03.571429
v.to.rast input=vec_$i type=area use=val=1 output=rast_$i --overwrite
r.mask raster=rast_$i --overwrite
r.reclass in=base_CGLS@base_maps out=$i rules=$i --overwrite
r.mapcalc "$i = $i" --overwrite
r.mask -r
done
```

194

## 195 **Acknowledgements**

196 This research is part of the Inspire4Nature Innovative Training Network, funded by the European  
197 Union's Horizon 2020 research and innovation program under the Marie Skłodowska-Curie grant  
198 agreement no. 766417. MDM acknowledges support from the M.U.R. Rita Levi Montalcini  
199 programme.

200

## 201 **Author contributions**

202

203 ML, CR, PFD, PRD and SHMB conceived the study. CR and ML developed the code for the analysis.  
204 ML, CDS and PRD developed the analysis. ML led the writing of the manuscript. All authors  
205 contributed to drafts and gave final approval for publication.

206

## 207 **Competing interests**

208

209 The authors declare no competing interests.

## 210 **References**

- 211 1. Rondinini, C. & Boitani, L. Mind the map: trips and pitfalls in making and reading maps of  
212 carnivore distribution. in *Carnivore Ecology and Conservation A Handbook of Techniques* 31–  
213 46 (Oxford University Press, 2013). doi:DOI: 10.1093/acprof:oso/9780199558520.003.0003.
- 214 2. Rondinini, C., Stuart, S. & Boitani, L. Habitat suitability models and the shortfall in  
215 conservation planning for African vertebrates. *Conserv. Biol.* **19**, 1488–1497 (2005).
- 216 3. Di Marco, M., Watson, J. E. M., Possingham, H. P. & Venter, O. Limitations and trade-offs in  
217 the use of species distribution maps for protected area planning. *J. Appl. Ecol.* **54**, 402–411  
218 (2017).
- 219 4. Ficetola, G. F. *et al.* An evaluation of the robustness of global amphibian range maps. *J.*  
220 *Biogeogr.* **41**, 211–221 (2014).
- 221 5. Brooks, T. M. *et al.* Measuring Terrestrial Area of Habitat (AOH) and Its Utility for the IUCN  
222 Red List. *Trends Ecol. Evol.* **xx**, 1–10 (2019).
- 223 6. Rondinini, C. *et al.* Global habitat suitability models of terrestrial mammals. *Philos. Trans. R.*  
224 *Soc. B Biol. Sci.* **366**, 2633–2641 (2011).

- 225 7. Ficetola, G. F., Rondinini, C., Bonardi, A., Baisero, D. & Padoa-Schioppa, E. Habitat availability  
226 for amphibians and extinction threat: A global analysis. *Divers. Distrib.* **21**, 302–311 (2015).
- 227 8. Beresford, A. E. *et al.* Poor overlap between the distribution of Protected Areas and globally  
228 threatened birds in Africa. *Anim. Conserv.* **14**, 99–107 (2011).
- 229 9. Tracewski, Ł. *et al.* Toward quantification of the impact of 21st-century deforestation on the  
230 extinction risk of terrestrial vertebrates. *Conserv. Biol.* **30**, 1070–1079 (2016).
- 231 10. IUCN. *Documentation standards and consistency checks for IUCN Red List assessments and*  
232 *species accounts. Version 2. vol. 2*  
233 [http://www.iucnredlist.org/documents/RL\\_Standards\\_Consistency.pdf](http://www.iucnredlist.org/documents/RL_Standards_Consistency.pdf) (2013).
- 234 11. IUCN. *Habitats Classification Scheme (Version 3.1)*. (2012).
- 235 12. Lumbierres, M., Dahal, P. R., Di Marco, M., Butchart, S. H. M., Donald, F. P. & Rondinini, C.  
236 Translating habitat class to land cover to map area of habitat of terrestrial vertebrates.  
237 *Conserv. Biol.* In press.(2021)
- 238 13. Strassburg, B. B. N. *et al.* Global priority areas for ecosystem restoration. *Nature* **586**, 724–  
239 729 (2020).
- 240 14. Hanson, J. O. *et al.* Global conservation of species' niches. *Nature* **580**, 232–234 (2020).
- 241 15. IUCN. *A Global Standard for the Identification of Key Biodiversity Areas , Version 1.0*. (IUCN,  
242 2016).
- 243 16. Dahal, P. R., Lumbierres, M., Butchart, S. H. M., Donald, P. F. & Rondinini, C. A validation  
244 standard for Area of Habitat maps for terrestrial birds and mammals. *bioRxiv*  
245 2021.07.02.450824 (2021) doi:10.1101/2021.07.02.450824.
- 246 17. IUCN. Mapping standards and data quality for the IUCN Red List Categories and Criteria.  
247 Version 1.16. *Prep. by Red List Tech. Work. Gr.* **16**, 30 (2018).
- 248 18. IUCN. The IUCN Red List of Threatened Species. Version 2020-2. *The IUCN Red List of*  
249 *Threatened Species. Version 2020-2*. <https://www.iucnredlist.org>. Downloaded on 09 May  
250 (2020).
- 251 19. KBA Standards and Appeals Committee. *Guidelines for using a Global Standard for the*  
252 *Identification of Key Biodiversity Areas. Version 1.0. Prepared by the KBA Standards and*  
253 *Appeals Committee of the IUCN Species Survival Commission and IUCN World Commission on*  
254 *Protected Areas*. (2019).
- 255 20. Jung, M. *et al.* A global map of terrestrial habitat types. *Sci. Data* **7**, 1–8 (2020).
- 256 21. Buchhorn, M. *et al.* Copernicus Global Land Service: Land Cover 100m: epoch 2015: Globe.  
257 Dataset of the global component of the Copernicus Land Monitoring Service le. (2019)  
258 doi:10.5281/zenodo.3243509.
- 259 22. Buchhorn, M. *et al.* Copernicus Global Land Service: Land Cover 100m: Version 2.02 Globe  
260 2015-2019: Product User Manual. *Version V2. 0.2* (2019) doi:doi: 10.5281/zenodo.3938963.
- 261 23. ESA (European Space Agency). Land Cover CCI Product User Guide Version 2. Tech. Rep.  
262 (2017).
- 263 24. USGS EROS Archive. Digital Elevation - Shuttle Radar Topography Mission (SRTM) 1 Arc-  
264 Second Global. (2019) doi:10.5066/F7PR7TFT.
- 265 25. GRASS Development Team. Geographic Resources Analysis Support System (GRASS)  
266 Software, Version 7.8.5. (2020).

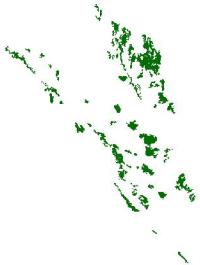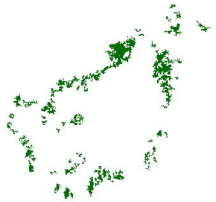



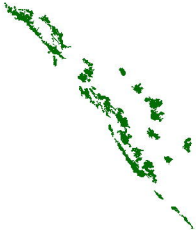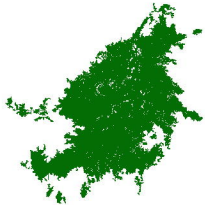

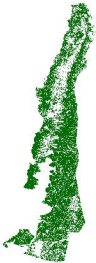

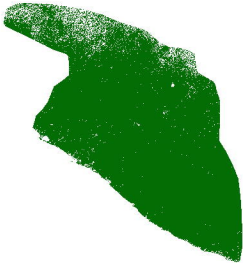

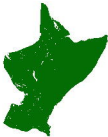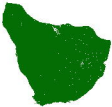

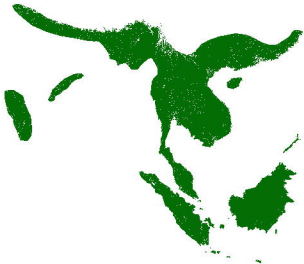

Source: https://www.biorxiv.org/content/10.1101/2022.05.13.489640v1.full.pdf
